# Supplementary material for: Highly efficient and stable Cs4PbBr6@KBr color conversion films constructed through inkjet printing technology
Source: Royal Society of Chemistry journal article supplement (doi:10.1039/d4tc01061b), 2024-01-01
Supplement: d4tc01061b1.pdf [file d4tc01061b1.pdf]

# Highly Efficient and Stable Cs<sub>4</sub>PbBr<sub>6</sub>@KBr Color Conversion Films Constructed through Inkjet Printing Technology

Yue Zhai<sup>1</sup>, Kecheng Dai<sup>1</sup>, Tongtong Xuan<sup>2</sup>, Wenhao Bai<sup>2</sup>, Shuchen Shi<sup>2</sup>, Hong Zhang<sup>1</sup>,  
Rongjun Xie<sup>2\*</sup> and Le Wang<sup>1\*</sup>

1. College of Optical and Electronic Technology, China Jiliang University, Hangzhou 310018, P. R. China;
2. State Key Laboratory of Physical Chemistry of Solid Surface, College of Materials, Xiamen University, Xiamen 361005, P. R. China

Corresponding Authors

\*E-mail: [rjxie@xmu.edu.cn](mailto:rjxie@xmu.edu.cn), [calla@cjl.u.edu.cn](mailto:calla@cjl.u.edu.cn)

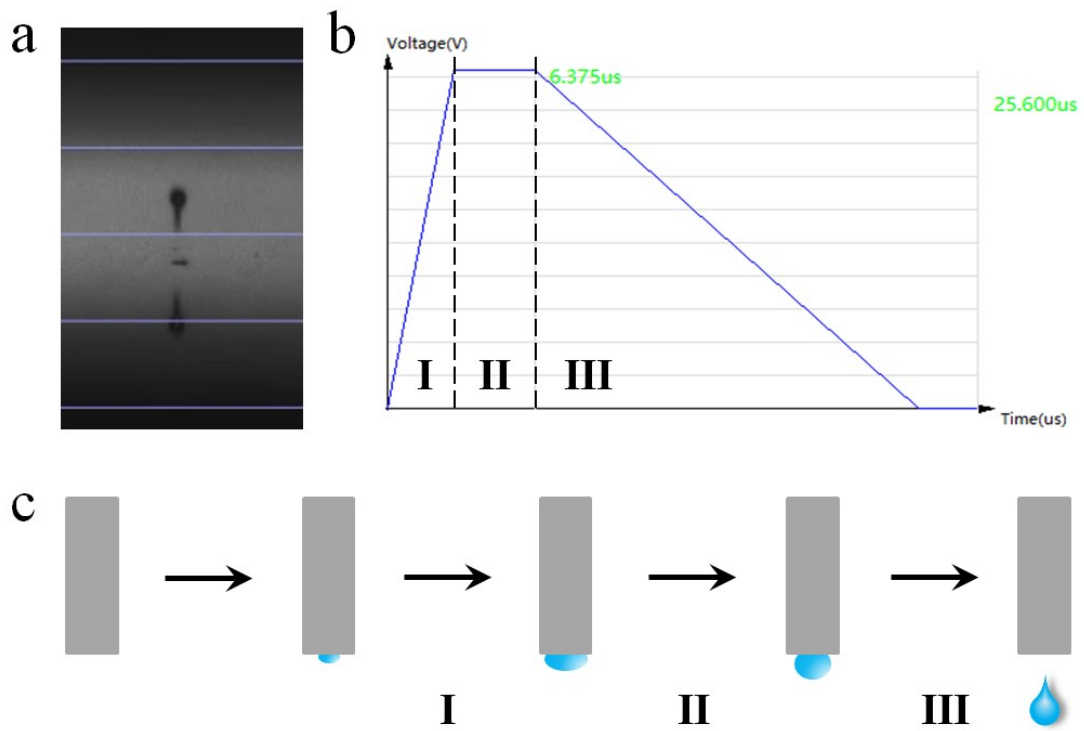

Figure S1. (a) Inkjet printing ink droplets; (b) Driving voltage diagrams and (c) Schematic diagram of droplet variation with driving voltage.

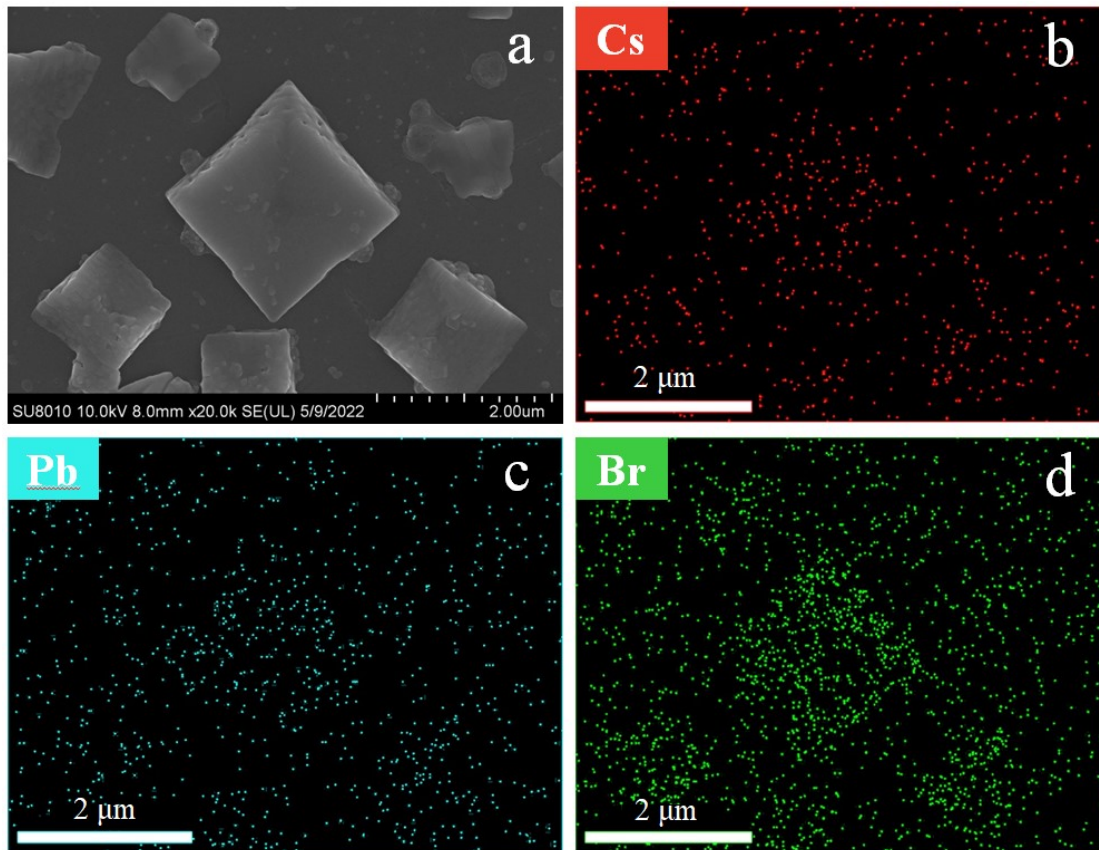

Figure S2 (a) SEM image and (b-d) the corresponding EDS elemental mapping images of perovskite prepared without introducing of KBr.

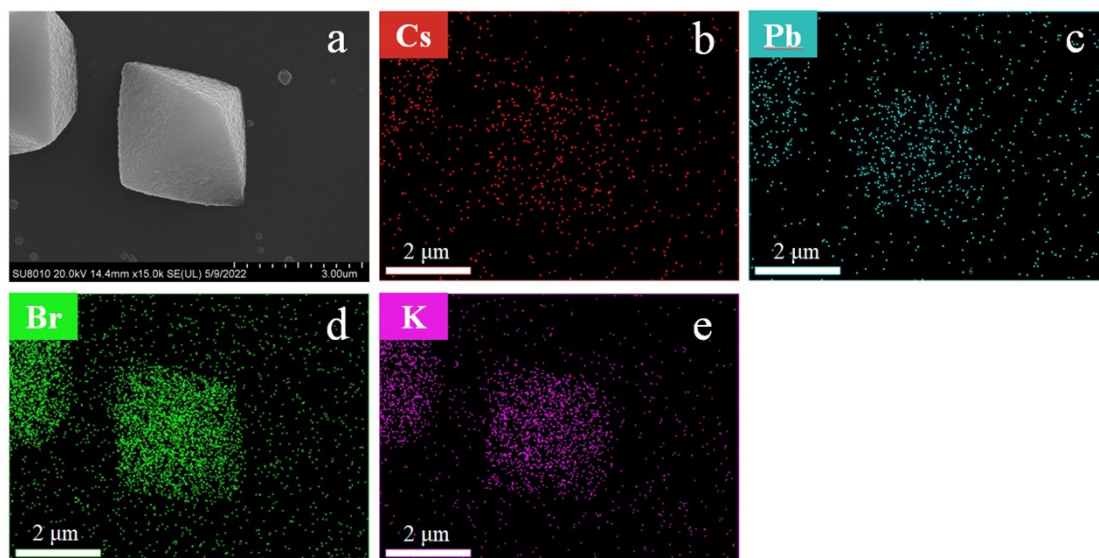

Figure S3 (a) SEM image and (b-e) the corresponding EDS elemental mapping images of  $\text{Cs}_4\text{PbBr}_6@\text{KBr}$  composite.

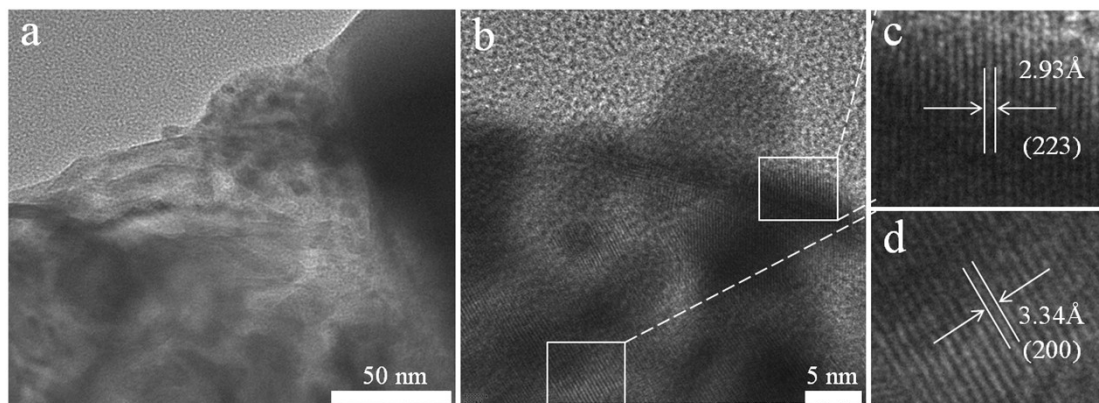

Figure S4 (a) TEM and (b-d) HR-TEM images of  $\text{Cs}_4\text{PbBr}_6@\text{KBr}$  composite.

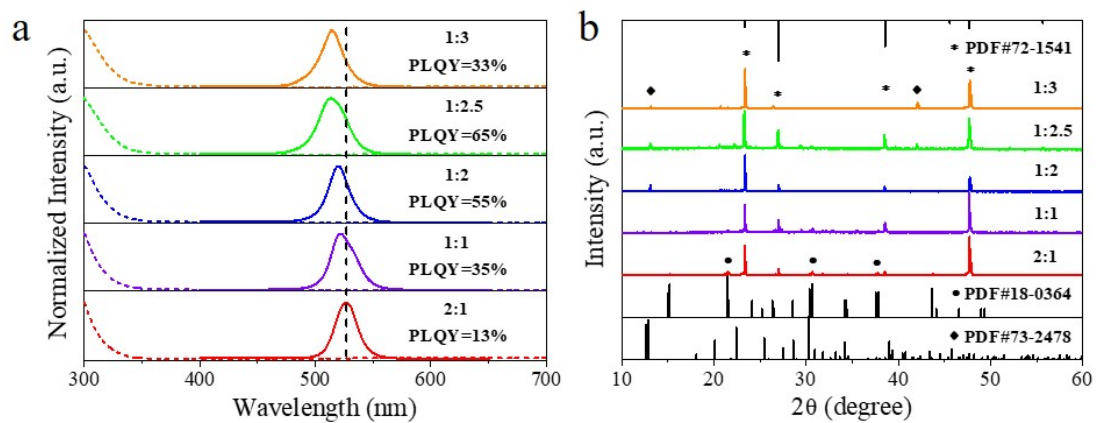

Figure S5. (a) UV-Vis absorption (dotted lines), photoluminescence spectra (solid lines) and (b) XRD patterns of KBr coated perovskite CCFs prepared with different PbBr<sub>2</sub> and CsBr ratios.

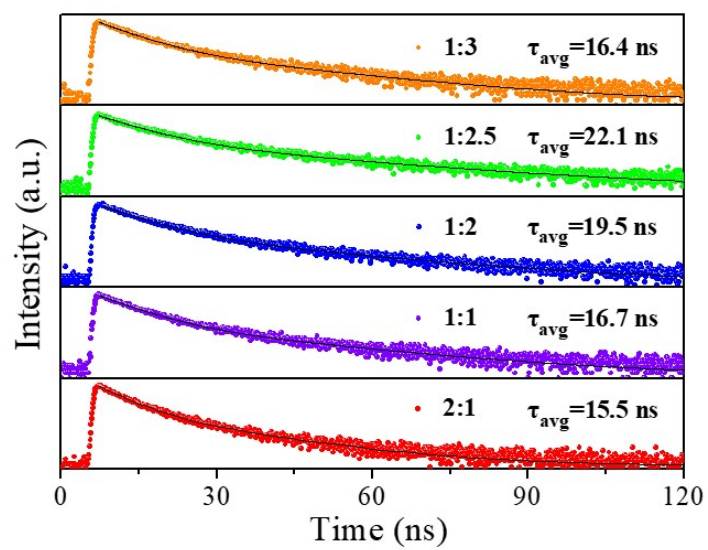

Figure S6 Photoluminescence decay curves of KBr coated perovskite CCFs printed with different ratio of PbBr<sub>2</sub> to CsBr.

Table S1 Emission decay curves fitting results of KBr coated perovskite CCFs with different ratio of PbBr<sub>2</sub> to CsBr

|       | $\tau_1$ (ns) | A <sub>1</sub> (%) | $\tau_2$ (ns) | A <sub>2</sub> (%) | $\tau_{avg}$ (ns) | non-radiative<br>recombination rate (s <sup>-1</sup> ) |
|-------|---------------|--------------------|---------------|--------------------|-------------------|--------------------------------------------------------|
| 2:1   | 3.9           | 49.25              | 17.9          | 50.75              | 15.5              | 5.6×10 <sup>7</sup>                                    |
| 1:1   | 5.9           | 55.89              | 20.6          | 44.11              | 16.7              | 3.9×10 <sup>7</sup>                                    |
| 1:2   | 6.2           | 45.62              | 22.6          | 54.38              | 19.5              | 2.3×10 <sup>7</sup>                                    |
| 1:2.5 | 6.3           | 39.66              | 24.7          | 60.34              | 22.1              | 1.6×10 <sup>7</sup>                                    |
| 1:3   | 5.0           | 38.98              | 18.4          | 61.02              | 16.4              | 4.1×10 <sup>7</sup>                                    |



Table S2 Emission decay curves fitting results of Cs<sub>4</sub>PbBr<sub>6</sub>@KBr CCFs with different substrate temperature

|       | $\tau_1$ (ns) | A <sub>1</sub> (%) | $\tau_2$ (ns) | A <sub>2</sub> (%) | $\tau_{\text{avg}}$ (ns) |
|-------|---------------|--------------------|---------------|--------------------|--------------------------|
| 50°C  | 6.5           | 40.33              | 21.3          | 59.67              | 18.8                     |
| 60°C  | 6.3           | 39.66              | 24.7          | 60.34              | 22.1                     |
| 70°C  | 6.2           | 25.41              | 28.9          | 74.59              | 27.4                     |
| 80°C  | 6.8           | 30.45              | 32.9          | 69.55              | 30.7                     |
| 90°C  | 6.8           | 24.59              | 33.5          | 75.41              | 31.8                     |
| 100°C | 7.0           | 20.49              | 35.9          | 79.51              | 34.5                     |

Table S3 Summarized thermal stability of previously reported materials

| Material                                                                                 | Temperature | Time    | Stability                                  | Reference |
|------------------------------------------------------------------------------------------|-------------|---------|--------------------------------------------|-----------|
| Cs <sub>4</sub> PbBr <sub>6</sub> @KBr CCFs                                              | 70 °C       | 16 h    | PL intensity maintains about 65%           | This Work |
| dual-phase Cs <sub>4</sub> PbBr <sub>6</sub> MCs/CsPbBr <sub>3</sub> NCs composites film | 373 K       | 240 min | PL intensity reduces to 80%                | 1         |
| Cs <sub>4</sub> PbBr <sub>6</sub> micro-disks (MDs)                                      | 85°C        | 6 h     | PLQY remains about 62.5%                   | 2         |
| Cs <sub>4</sub> PbBr <sub>6</sub> -Zn(moi) <sub>2</sub>                                  | 100 °C      | 6 h     | PL emission intensity maintains around 95% | 3         |
| FAPbBr <sub>3</sub> /Cs <sub>4</sub> PbBr <sub>6</sub> NCs film                          | 60 °C       | 96 h    | PL intensity decreased by 45%              | 4         |
| N-GQD/CsPbBr <sub>3</sub> composite                                                      | 100 °C      | 2 h     | PL emission intensity retains 10%          | 5         |
| DDAB/ZnBr <sub>2</sub> -treated CsPbBr <sub>3</sub> NCs                                  | 50 °C       | 60 min  | PL intensity preserved ~90%                | 6         |
| CsPbBr <sub>3</sub> PQDs film                                                            | 100 °C      | 15 min  | almost completely lose their PL            | 7         |

## References

1. Q. Wang, W. Wu, R. Wu, S. Yang, Y. Wang, J. Wang, Z. Chai and Q. Han, *Journal of Colloid and Interface Science*, 2019, 554, 133-141.
2. H. H. Zhang, Q. Liao, Y. S. Wu, J. W. Chen, Q. G. Gao and H. B. Fu, *Physical*

*Chemistry Chemical Physics*, 2017, 19, 29092-29098.

3. X. X. Feng, P. X. Xu, J. L. Liu, X. Y. Zhao, J. Cao and J. C. Liu, *Inorganic Chemistry*, 2022, 61, 17590-17598.

4. Y. Zeng, W. Chen, Y. Deng, W. Gu, C. Wu, Y. Guo, P. Huang, F. Liu and H. Li, *ACS Applied Nano Materials*, 2022, 5, 9534-9543.

5. Z. Xue, H. Gao, W. Liu and X. Li, *ACS Applied Electronic Materials*, 2019, 1, 2244-2252.

6. Y. Zhang, G. Hou, Y. Wu, M. Chen, Y. Dai, S. Liu, Q. Zhao, H. Lin, J. Fang, C. Jing and J. Chu, *Langmuir*, 2023, 39, 6222-6230.

7. Y. Cai, L. Wang, T. Zhou, P. Zheng, Y. Li and R.-J. Xie, *Nanoscale*, 2018, 10, 21441-21450.
